# Supplementary material
Source: publisher site journal article supplement (https://www.dovepress.com/article/268282)
Supplement: Supplementary file 1 [file get_supplementary_file.php]

**
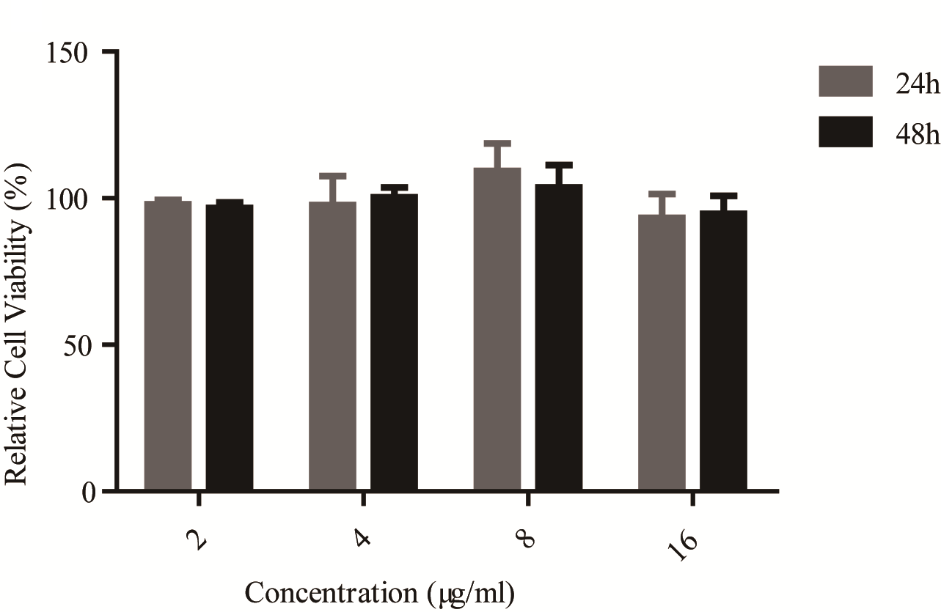
**

**Supplementary Figure1.** Cell viability CCK8 assay for ILC2s

**Supplementary Table 1.** The size and PDI of DiR-SPIO-ST2-NPs and DiR-SPIO-IgG.

|  | Number mean | PdI |
| --- | --- | --- |
| DiR-SPIO-IgG | 66.11 | 0.234 |
| DiR-SPIO-IgG | 64.2 | 0.233 |
| DiR-SPIO-IgG | 70.13 | 0.239 |
| DiR-SPIO-ST2 | 49.96 | 0.255 |
| DiR-SPIO-ST2 | 37.16 | 0.256 |
| DiR-SPIO-ST2 | 32.77 | 0.242 |
| DiR-SPIO-mall | 37.65 | 3.24 |

**Supplementary Table 2**. The stability of SPIONs in different media.

| DiR-SPIO-ST2 | |  |  |  |  |  |  |  |  |  |  |  |  |  |  |  |
| --- | --- | --- | --- | --- | --- | --- | --- | --- | --- | --- | --- | --- | --- | --- | --- | --- |
| Time | water |  |  | NaCl |  |  |  | PBS |  |  | medium | |  | serum |  |  |
| 0 | 36.03 | 35.54 | 41.39 | 46.96 | 43.78 |  | 47.45 | 47.34 | 39.42 | 40.14 | 45.27 | 57.76 | 41.78 | 56.42 | 46.25 | 46.5 |
| 1 | 28.47 | 37.87 | 39.89 | 46.66 | 44.29 |  | 47.36 | 46.12 | 41.17 | 45.82 | 40.6 | 42.58 | 43.64 | 43.56 | 42.08 | 42.89 |
| 2 | 33.3 | 36.01 | 43.72 | 44.11 | 48.21 |  | 43.66 | 47.21 | 43.46 | 49.3 | 39.84 | 42.32 | 38.4 | 40.69 | 49.74 | 41.26 |
| 4 | 24.56 | 48 | 47.41 | 44.24 | 49.68 |  | 44.4 | 35.91 | 42.25 | 47.87 | 41.27 | 38.07 | 44.7 | 42.07 | 39.82 | 53.93 |
| 8 | 37.66 | 27.88 | 37.99 | 43.54 | 43.47 |  | 43.67 | 48.5 | 45.13 | 53.16 | 51.58 | 46.87 | 36.18 | 45.52 | 44.91 | 47.4 |
| 12 | 32.27 | 42.3 | 49.3 | 44.45 | 49.38 |  | 45.34 | 42.32 | 48.89 | 43.58 | 42.71 | 46.33 | 39.02 | 47.35 | 37.89 | 41.19 |
| 24 | 43.29 | 38.13 | 36.96 | 47.46 | 45.95 |  | 42.13 | 43.96 | 41.18 | 42.82 | 43.15 | 37.64 | 36.28 | 41.51 | 48.42 | 41.33 |
|  |  |  |  |  |  |  |  |  |  |  |  |  |  |  |  |  |
| DiR-SPIO-IgG | |  |  |  |  |  |  |  |  |  |  |  |  |  |  |  |
| Time | water |  |  | NaCl |  |  |  | PBS |  |  | medium | |  | serum |  |  |
| 0 | 26.11 | 26.96 | 29.42 | 28.19 | 29.09 |  | 31.53 | 32.65 | 28.87 | 31.53 | 28.68 | 14.77 | 31.96 | 35.34 | 31.09 | 27.77 |
| 1 | 21.36 | 30.07 | 28.79 | 30.88 | 34.02 |  | 30.65 | 36.78 | 31.55 | 31.21 | 30.82 | 28.46 | 32.48 | 32.57 | 31.25 | 31.51 |
| 2 | 24.18 | 23.26 | 32.17 | 33.9 | 38.3 |  | 33.95 | 32.48 | 34.45 | 37.69 | 29.98 | 33.01 | 26.99 | 28.83 | 32.09 | 32.95 |
| 4 | 19.17 | 29.26 | 14.67 | 32.68 | 35.97 |  | 35.8 | 28.03 | 30.64 | 32.61 | 29.72 | 29.9 | 31.3 | 30.97 | 26.86 | 30.07 |
| 8 | 29.66 | 15.76 | 30.12 | 32.32 | 34.26 |  | 29.84 | 34.82 | 29.01 | 33.7 | 32.29 | 35.69 | 27.7 | 30.34 | 29.5 | 32.51 |
| 12 | 21.98 | 31.02 | 30.51 | 34.54 | 37.23 |  | 34.44 | 33.78 | 31.61 | 33.74 | 28.83 | 29.18 | 30.31 | 34.56 | 24.31 | 31.32 |
| 24 | 27.86 | 24.3 | 27.88 | 36.49 | 31.92 |  | 27.5 | 36.45 | 32.24 | 30.95 | 32.19 | 25.85 | 29.19 | 31.12 | 29.78 | 30.89 |
